# Supplementary material for: Role of Type 2 Diabetes in Determining Retinal, Renal, and Cardiovascular Outcomes in Women With Previous Gestational Diabetes Mellitus
Source: Oxford University Press journal article supplement (doi:10.2337/dc16-1400), 2016-11-07
Supplement: dc161400supplementarydata.pdf [file dc161400supplementarydata.pdf]

## SUPPLEMENTARY DATA

**Supplementary Table 1.** Absolute event rates for each outcome in each of the exposure groups, and the age and time since pregnancy at which the outcome occurred

|                                                | <u>No GDM &amp; no DM</u> | <u>No GDM &amp; then DM</u> | <u>GDM &amp; no DM</u> | <u>GDM &amp; then DM</u> |
|------------------------------------------------|---------------------------|-----------------------------|------------------------|--------------------------|
| <b>(I) Retinopathy procedures</b>              |                           |                             |                        |                          |
| Absolute event rate (per 100,000 person-years) | 21.7                      | 54.3                        | 22.2                   | 113.8                    |
| Age at onset (Mean ± SD)                       | 40.2 ± 7.8                | 43.0 ± 8.0                  | 41.3 ± 6.8             | 43.8 ± 7.5               |
| Years since pregnancy at onset (Mean ± SD)     | 8.4 ± 5.6                 | 11.7 ± 5.8                  | 7.1 ± 5.8              | 12.0 ± 5.5               |
| <b>(II) Dialysis initiation</b>                |                           |                             |                        |                          |
| Absolute event rate (per 100,000 person-years) | 2.3                       | 12.6                        | 2.5                    | 17.8                     |
| Age at onset (Mean ± SD)                       | 37.8 ± 8.4                | 40.2 ± 7.7                  | 36.9 ± 9.7             | 42.5 ± 7.3               |
| Years since pregnancy at onset (Mean ± SD)     | 8.7 ± 5.1                 | 10.4 ± 5.2                  | 6.2 ± 6.1              | 11.0 ± 6.1               |
| <b>(III) Foot infection hospitalization</b>    |                           |                             |                        |                          |
| Absolute event rate (per 100,000 person-years) | 9.3                       | 41.0                        | 9.8                    | 40.5                     |
| Age at onset (Mean ± SD)                       | 36.5 ± 8.0                | 39.9 ± 8.4                  | 35.3 ± 7.5             | 41.0 ± 7.8               |
| Years since pregnancy at onset (Mean ± SD)     | 7.5 ± 5.3                 | 9.9 ± 5.6                   | 5.8 ± 5.0              | 9.6 ± 5.9                |
| <b>(IV) Cardiovascular disease events</b>      |                           |                             |                        |                          |
| Absolute event rate (per 100,000 person-years) | 25.9                      | 66.8                        | 33.4                   | 88.7                     |
| Age at onset (Mean ± SD)                       | 41.8 ± 7.6                | 45.7 ± 6.6                  | 41.4 ± 6.6             | 45.5 ± 6.5               |
| Years since pregnancy at onset (Mean ± SD)     | 10.2 ± 5.6                | 13.7 ± 4.3                  | 8.0 ± 5.3              | 12.0 ± 4.4               |
| <b>(V) Coronary artery disease events</b>      |                           |                             |                        |                          |
| Absolute event rate (per 100,000 person-years) | 15.5                      | 47.3                        | 21.6                   | 70.2                     |
| Age at onset (Mean ± SD)                       | 43.1 ± 7.0                | 45.8 ± 6.4                  | 42.6 ± 6.2             | 46.0 ± 6.7               |
| Years since pregnancy at onset (Mean ± SD)     | 10.9 ± 5.3                | 13.9 ± 4.0                  | 8.5 ± 5.2              | 12.4 ± 4.3               |

SUPPLEMENTARY DATA

**Supplementary Table 2.** Hazard ratios for cardiovascular and coronary artery disease events with percutaneous coronary intervention (PCI) included in the outcomes (main analyses) and not included in the outcomes (sensitivity analyses)

|                                | <b>With PCI</b> |               |          | <b>Without PCI</b> |               |          |
|--------------------------------|-----------------|---------------|----------|--------------------|---------------|----------|
|                                | <b>HR</b>       | <b>95% CI</b> | <b>p</b> | <b>HR</b>          | <b>95% CI</b> | <b>p</b> |
| <b><u>UNADJUSTED</u></b>       |                 |               |          |                    |               |          |
| Cardiovascular disease events  |                 |               |          |                    |               |          |
| GDM & then DM                  | 3.38            | (2.89-3.96)   | <0.0001  | 3.30               | (2.82-3.88)   | <0.0001  |
| GDM & no DM                    | 1.53            | (1.26-1.86)   | <0.0001  | 1.53               | (1.26-1.86)   | <0.0001  |
| No GDM & then DM               | 2.18            | (1.98-2.39)   | <0.0001  | 2.15               | (1.95-2.36)   | <0.0001  |
| No GDM & no DM                 | Reference       |               |          | Reference          |               |          |
| Coronary artery disease events |                 |               |          |                    |               |          |
| GDM & then DM                  | 4.44            | (3.72-5.30)   | <0.0001  | 4.35               | (3.62-5.21)   | <0.0001  |
| GDM & no DM                    | 1.73            | (1.36-2.20)   | <0.0001  | 1.73               | (1.35-2.21)   | <0.0001  |
| No GDM & then DM               | 2.49            | (2.22-2.78)   | <0.0001  | 2.46               | (2.19-2.76)   | <0.0001  |
| No GDM & no DM                 | Reference       |               |          | Reference          |               |          |
| <b><u>ADJUSTED</u></b>         |                 |               |          |                    |               |          |
| Cardiovascular disease events  |                 |               |          |                    |               |          |
| GDM & then DM                  | 2.82            | (2.41-3.30)   | <0.0001  | 2.76               | (2.35-3.24)   | <0.0001  |
| GDM & no DM                    | 1.30            | (1.07-1.59)   | 0.008    | 1.31               | (1.07-1.59)   | 0.008    |
| No GDM & then DM               | 2.01            | (1.82-2.20)   | <0.0001  | 1.98               | (1.80-2.18)   | <0.0001  |
| No GDM & no DM                 | Reference       |               |          | Reference          |               |          |
| Coronary artery disease events |                 |               |          |                    |               |          |
| GDM & then DM                  | 3.54            | (2.96-4.23)   | <0.0001  | 3.47               | (2.89-4.16)   | <0.0001  |
| GDM & no DM                    | 1.41            | (1.11-1.80)   | 0.005    | 1.42               | (1.11-1.81)   | 0.005    |
| No GDM & then DM               | 2.25            | (2.01-2.52)   | <0.0001  | 2.22               | (1.98-2.50)   | <0.0001  |
| No GDM & no DM                 | Reference       |               |          | Reference          |               |          |
